# Supplementary material for: Kv3.4 is modulated by HIF-1α to protect SH-SY5Y cells against oxidative stress-induced neural cell death
Source: PubMed Central journal article supplement (PMC5437029; doi:10.1038/s41598-017-02129-w), 2017-05-18
Supplement: 41598_2017_2129_MOESM1_ESM.pdf [file 41598_2017_2129_MOESM1_ESM.pdf]

**Kv3.4 is modulated by HIF-1 $\alpha$  to protect SH-SY5Y cells against  
oxidative stress-induced neural cell death**

Min Seok Song, Pan Dong Ryu, So Yeong Lee\*

Laboratory of Veterinary Pharmacology, College of Veterinary Medicine and Research  
Institute for Veterinary Science, Seoul National University, Seoul, 08826, Korea.

Corresponding Author:

So Yeong Lee, DVM, PhD

Laboratory of Veterinary Pharmacology

College of Veterinary Medicine, Seoul National University,

1 Gwanak-ro, Gwanak-gu, Seoul, 08826, Korea

Tel: + 82-2-880-1283

Fax: +82-2-879-0378

E-mail: leeso@snu.ac.kr

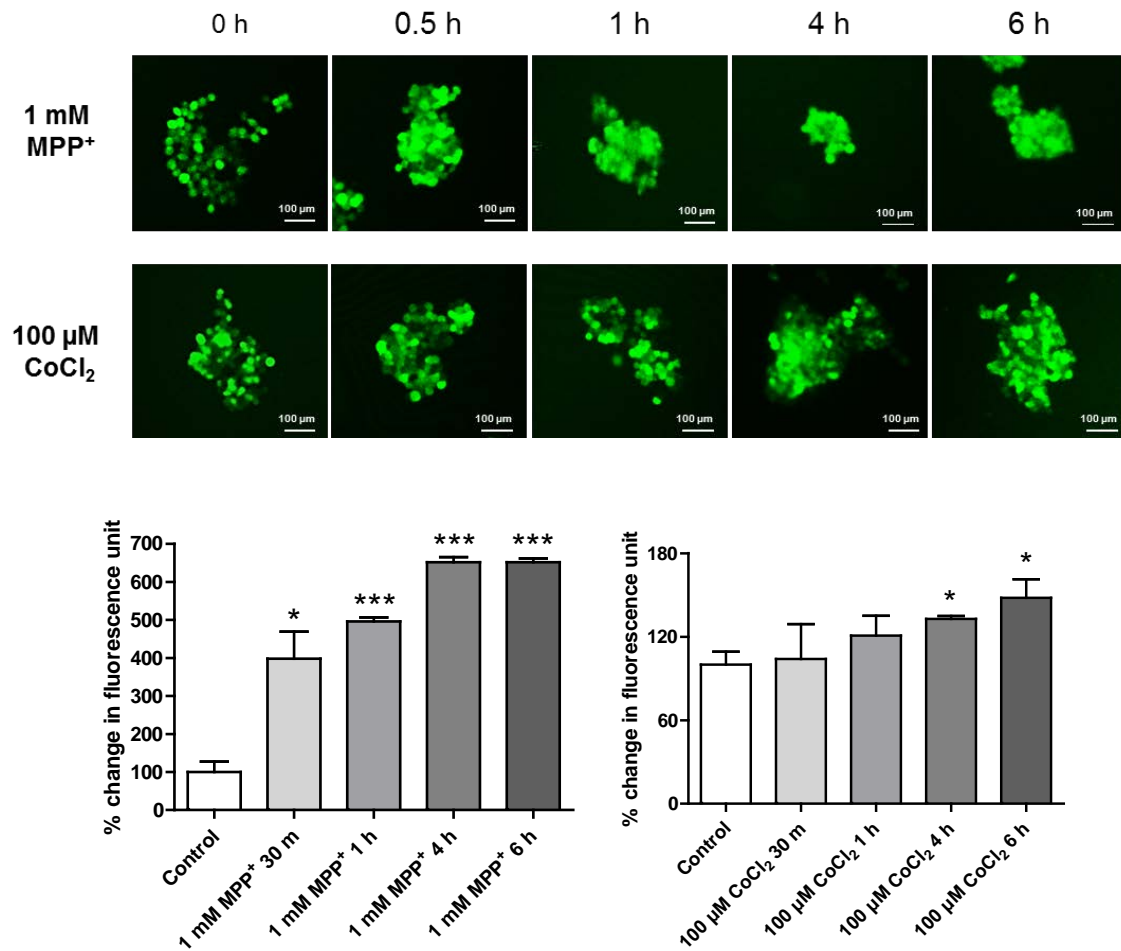

**Supplementary Figure 1. MPP<sup>+</sup>- or CoCl<sub>2</sub>-induced oxidative stress measurement in SH-SY5Y cells** Oxidative stress induced by MPP<sup>+</sup> or CoCl<sub>2</sub> treatment was measured in SH-SY5Y cells using the DCFH-DA method. MPP<sup>+</sup> effectively induced a large amount of oxidative stress after 30 min treatment, and the generated oxidative stress was saturated after 4 h treatment. On the other hand, CoCl<sub>2</sub> significantly induced oxidative stress after 4 hours of treatment. All experiments were performed in triplicate; representative images are shown.
